# Supplementary figures and images for: Synthesis of cauliflower-like ion imprinted polymers for selective adsorption and separation of lithium ion
Source: Royal Society of Chemistry journal article supplement (doi:10.1039/c8nj03249a), 2018-01-01

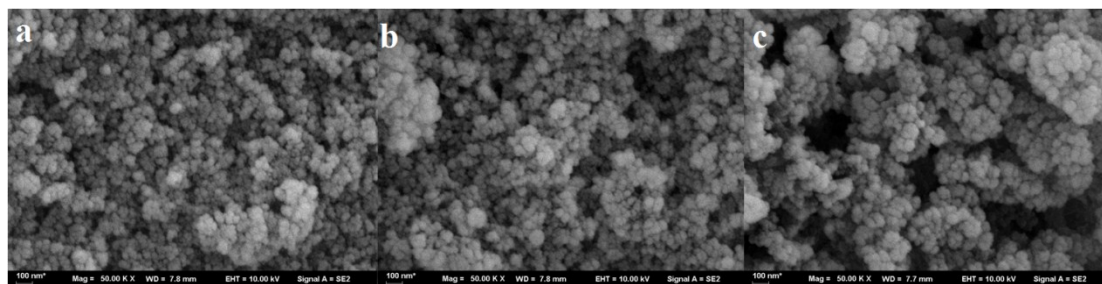

Figure S1 SEM images of Li-IIPs with 0.1mmol (a), 0.2 mmol (b) and 0.3 mmol (c) template amount

Supplement: c8nj03249a1.pdf [file c8nj03249a1.pdf]
